# Supplementary material for: Treatment strategies with combined agency against severe viral pneumonia in patients with advanced cancer
Source: PubMed Central journal article supplement (PMC11285019; doi:10.2478/jtim-2024-0007), 2024-07-27
Supplement: jtim-2024-0007_sm.pdf [file jtim-2024-0007_sm.pdf]

## Treatment strategies with combined agency against severe viral pneumonia in patients with advanced cancer

Fan Zhang<sup>1</sup>, Tao Li<sup>1</sup>, Yibing Bai<sup>1,2</sup>, Jiayi Liu<sup>1,3</sup>, Jiapei Qin<sup>1,2</sup>, An Wang<sup>1,2</sup>, Yimin Zhu<sup>4</sup>, Min Zhang<sup>5</sup>, Zhiqiang Ma<sup>1</sup>, Xin Zhou<sup>1,2</sup>, Lijie Wang<sup>1</sup>, Ming Gao<sup>1</sup>, Xiaodong Wu<sup>1</sup>, Yan Shao<sup>1</sup>, Xiangfei Zhao<sup>6</sup>, Juyi Wen<sup>6</sup>, Jingzhi Guan<sup>4</sup>, Jinliang Wang<sup>1</sup>, Junxun Ma<sup>1</sup>, Taohai Tao<sup>1</sup>, Yi Hu<sup>1</sup>

**Supplementary Table S1.** Demographic and baseline clinical characteristics of patients with advanced cancer and SARS-CoV-2 infection

| Characteristic    | Patients ( <i>n</i> = 89)     |                                        |                                    | <i>P</i> -value |
|-------------------|-------------------------------|----------------------------------------|------------------------------------|-----------------|
|                   | All patients ( <i>n</i> = 89) | Non-severe SARS-CoV-2 ( <i>n</i> = 33) | Severe SARS-CoV-2 ( <i>n</i> = 56) |                 |
| Age median, years | 62 (31-91)                    | 58.5 (31-74)                           | 66 (33-91)                         | 0.005           |
| Gender            |                               |                                        |                                    |                 |
| Male              | 69                            | 23 (33.33%)                            | 46 (66.67%)                        | 0.174           |
| Female            | 20                            | 10 (50%)                               | 10 (50%)                           |                 |
| Smoking history   |                               |                                        |                                    |                 |
| Never smoked      | 45                            | 22 (48.89%)                            | 23 (51.11%)                        | 0.020           |
| Smoker            | 44                            | 11 (25%)                               | 33 (75%)                           |                 |
| BMI               |                               |                                        |                                    |                 |
| ≤ 25              | 59                            | 23 (38.98%)                            | 36 (61.02%)                        | 0.602           |
| > 25              | 30                            | 10 (33.33%)                            | 20 (66.67%)                        | 0.602           |
| ECOG              |                               |                                        |                                    |                 |
| 0-2               | 57                            | 28 (49.12%)                            | 29 (50.88%)                        | 0.002           |
| 3-4               | 32                            | 5 (15.6%)                              | 27 (84.4%)                         |                 |
| SpO <sub>2</sub>  |                               |                                        |                                    |                 |

|                                          |    |             |             |        |
|------------------------------------------|----|-------------|-------------|--------|
| ≤93                                      | 31 | 0 (0.0%)    | 31 (100.0%) | <0.001 |
| > 93                                     | 36 | 19 (52.78%) | 17 (47.22%) |        |
| Distant metastasis                       | 73 | 27 (36.99%) | 46 (63.01%) | 0.969  |
| Tumor diagnosis                          |    |             |             |        |
| Lung cancer                              | 35 | 11 (31.42%) | 24 (68.57%) | 0.374  |
| Digestive system cancer                  | 36 | 14 (38.89%) | 22 (61.11%) | 0.771  |
| Head and neck cancer                     | 7  | 3 (42.9%)   | 4 (57.1%)   | 1      |
| Genitourinary cancer                     | 10 |             |             |        |
| Gynecological tumor                      | 5  | 4 (80.0%)   | 1 (20.0%)   | 0.117  |
| Prostate cancer                          | 1  | 0 (0.0%)    | 1 (100.0%)  | 1      |
| Urologic neoplasms                       | 2  | 0 (0.0%)    | 2 (100.0%)  | 0.528  |
| Breast cancer                            | 2  | 1 (50.0%)   | 1 (50.0%)   | 1      |
| Other                                    | 1  | 0 (0.0%)    | 1 (100.0%)  | 1      |
| History of prior treatment               |    |             |             |        |
| Surgery                                  | 32 | 12 (37.5%)  | 20 (62.5%)  | 0.001  |
| Radiotherapy                             | 12 | 4 (33.33%)  | 8 (66.67%)  | 1      |
| Immunotherapy                            | 40 | 15 (37.5%)  | 25 (62.5%)  | 0.941  |
| Chemotherapy                             | 53 | 24 (45.28%) | 29 (54.72%) | 0.052  |
| Targeted therapy                         | 24 |             |             |        |
| Tyrosine kinase inhibitor therapy        | 10 | 4 (40.0%)   | 6 (60.0%)   | 1      |
| Antiangiogenic therapy                   | 14 | 4 (28.6%)   | 10 (71.4%)  | 0.677  |
| Treatment for cancer <14 d               | 17 | 9 (52.94%)  | 8 (47.06%)  | 0.132  |
| Checkpoint inhibitor-related pneumonitis |    |             |             |        |
| YES                                      | 5  | 0 (0.0%)    | 5 (100.0%)  | 0.137  |
| NO                                       | 35 | 15 (42.86%) | 20 (57.14%) |        |
| Symptoms and signs at on admission       |    |             |             |        |

|                           |                     |                     |                    |        |
|---------------------------|---------------------|---------------------|--------------------|--------|
| Fever                     | 57                  | 5 (8.77%)           | 52 (91.23%)        | <0.001 |
| Aversion to cold          | 13                  | 1 (7.69%)           | 12 (85.7%)         | 0.039  |
| Cough                     | 49                  | 8 (16.33%)          | 41 (83.67%)        | <0.001 |
| Fatigue                   | 44                  | 4 (9.09%)           | 40 (90.91%)        | <0.001 |
| Dyspnea                   | 46                  | 1 (2.17%)           | 45 (97.83%)        | <0.001 |
| Expectoration             | 39                  | 2 (5.13%)           | 37 (94.87%)        | <0.001 |
| Chest tightness           | 48                  | 3 (6.25%)           | 45 (93.75%)        | <0.001 |
| Sore throat               | 24                  | 5 (20.83%)          | 19 (79.17%)        | 0.054  |
| Comorbidity               |                     |                     |                    |        |
| Diabetes                  | 13                  | 3 (23.08%)          | 10 (76.92%)        | 0.412  |
| Cerebrovascular disease   | 10                  | 6 (60.0%)           | 4 (40.0%)          | 0.213  |
| Hypertension              | 25                  | 6 (24.0%)           | 19 (76.0%)         | 0.11   |
| Comorbid lung disease     | 43                  | 5 (11.63%)          | 38 (88.37%)        | <0.001 |
| Organ damage indices      |                     |                     |                    |        |
| WBC                       | 7.52 (1.64-21.8)    | 5.95 (1.64-17.44)   | 7.52 (2.07-21.8)   | 0.006  |
| Neutrophil count          | 4.10 (0.80-19.53)   | 2.74 (0.80-15.8)    | 5.05 (1.40-19.53)  | 0.008  |
| IL-6                      | 53.7 (5.08-543.3)   | 29.59 (5.13-65.31)  | 63 (5.08-543.3)    | 0.161  |
| CRP                       | 9.42 (0.18-295.3)   | 2.193 (0.18-9.4)    | 13 (0.25-295.3)    | 0.045  |
| LDH                       | 192.5 (47.1-1695.6) | 190.8 (75.9-1695.6) | 330.4 (47.1-517.1) | 0.012  |
| NLR                       | 4.09 (0.87-82)      | 2.67 (0.87-28.3)    | 4.7 (0.93-82)      | 0.048  |
| Thrombin time             | 15.1 (10.7-43.2)    | 15.6 (10.7-18)      | 14.9 (11.1-43.2)   | <0.001 |
| Prothrombin time activity | 82.75 (28-130)      | 105 (46-119)        | 78 (28-130)        | 0.002  |

BMI: Body Mass Index; Eastern Cooperative Oncology Group (ECOG) Performance Status; IL-6: Interleukin-6; CRP: C-reactive protein; LDH: Lactic dehydrogenase; PLT: platelet.

**Supplementary Table S2.** The outcome of different treatments in patients with advanced cancer and SARS-CoV-2 infection

|                           | <b>Cured</b> | <b>Deaths</b> | <b>Total</b> | <b><i>P</i>-value</b> |
|---------------------------|--------------|---------------|--------------|-----------------------|
| Total                     | <b>39</b>    | 17            | 56           | 0.049                 |
| PROMISING regimen         | 7            | 0             | 7            |                       |
| Five-medication regimens  | 2            | 1             | 3            |                       |
| Four-medication regimens  | 4            | 2             | 6            |                       |
| Three-medication regimens | 13           | 6             | 19           |                       |
| Two-medication regimens   | 13           | 8             | 21           |                       |

**Supplementary Table S3.** Demographic and baseline clinical characteristics of patients with advanced cancer and treated with different regimens

| Characteristic          | Patients                 |                              |                            | P-value |
|-------------------------|--------------------------|------------------------------|----------------------------|---------|
|                         | All patients<br>(n = 28) | PROMISING regimen<br>(n = 7) | Other regimens<br>(n = 21) |         |
| Age median, years       | 60 (38-79)               | 58.5 (49-76)                 | 62 (38-79)                 |         |
| Sex                     |                          |                              |                            | 1       |
| Male                    | 14 (50)                  | 4                            | 10                         |         |
| Female                  | 14 (50)                  | 3                            | 11                         |         |
| Smoking history         |                          |                              |                            | 1       |
| Never smoked            | 14 (50)                  | 4                            | 10                         |         |
| Smokers                 | 14 (50)                  | 3                            | 11                         |         |
| BMI                     |                          |                              |                            | 1       |
| ≤ 25                    | 17 (60.7)                | 4                            | 13                         |         |
| > 25                    | 11 (39.3)                | 3                            | 8                          |         |
| ECOG                    |                          |                              |                            | 0.595   |
| 0-2                     | 6 (21.43)                | 1                            | 5                          |         |
| 3-4                     | 22 (78.57)               | 6                            | 16                         |         |
| SpO <sub>2</sub>        |                          |                              |                            | 0.290   |
| ≤93                     | 23 (82.1)                | 7                            | 16                         |         |
| >93                     | 5 (17.9)                 | 0                            | 5                          |         |
| Tumor diagnosis         |                          |                              |                            | 0.747   |
| Lung cancer             | 8                        | 3                            | 5                          |         |
| Digestive system cancer | 7                        | 2                            | 5                          |         |
| Genitourinary cancer    | 6                        | 1                            | 5                          |         |

---

|                       |          |   |    |       |
|-----------------------|----------|---|----|-------|
| Breast cancer         | 4        | 1 | 3  |       |
| Other                 | 3        | 0 | 3  |       |
| Comorbid lung disease |          |   |    | 0.198 |
| YES                   | 13(46.4) | 5 | 8  |       |
| NO                    | 15(53.6) | 2 | 13 |       |

---

**Supplementary Table S4.** Treatment-related adverse events associated with the PROMISING regimen and other treatment regimens in patients with advanced cancer and SARS-CoV-2 infection

|                                       | <b>All patients (<i>n</i> = 56)</b> | <b>PROMISING regimen Group (<i>n</i> = 7)</b> | <b>Other regimens group (<i>n</i> = 49)</b> |
|---------------------------------------|-------------------------------------|-----------------------------------------------|---------------------------------------------|
| Secondary infection                   | 17                                  | 0                                             | 17                                          |
| Hyperglycemia                         | 14                                  | 3                                             | 11                                          |
| Dysgustatory                          | 1                                   | 0                                             | 1                                           |
| Hypertension                          | 2                                   | 1                                             | 1                                           |
| Myelosuppression                      | 2                                   | 0                                             | 1                                           |
| Renal damage                          | 5                                   | 0                                             | 5                                           |
| Liver damage                          | 6                                   | 2                                             | 4                                           |
| Gastrointestinal reaction             | 11                                  | 1                                             | 10                                          |
| Peripheral edema and hypersensitivity | 1                                   | 0                                             | 1                                           |
| Ecchymosis                            | 1                                   | 0                                             | 1                                           |
| Gingival bleeding                     | 2                                   | 0                                             | 2                                           |
| Hematuria                             | 2                                   | 0                                             | 2                                           |
